# Supplementary material for: Construction and topological analysis of an endometriosis-related exosomal circRNA-miRNA-mRNA regulatory network
Source: publisher site journal article supplement (doi:10.18632/aging.202937), 2021-04-26
Supplement: Supplementary file [file aging-v13i9-202937-supplementary-material-SD1.pdf]

SUPPLEMENTARY FIGURES

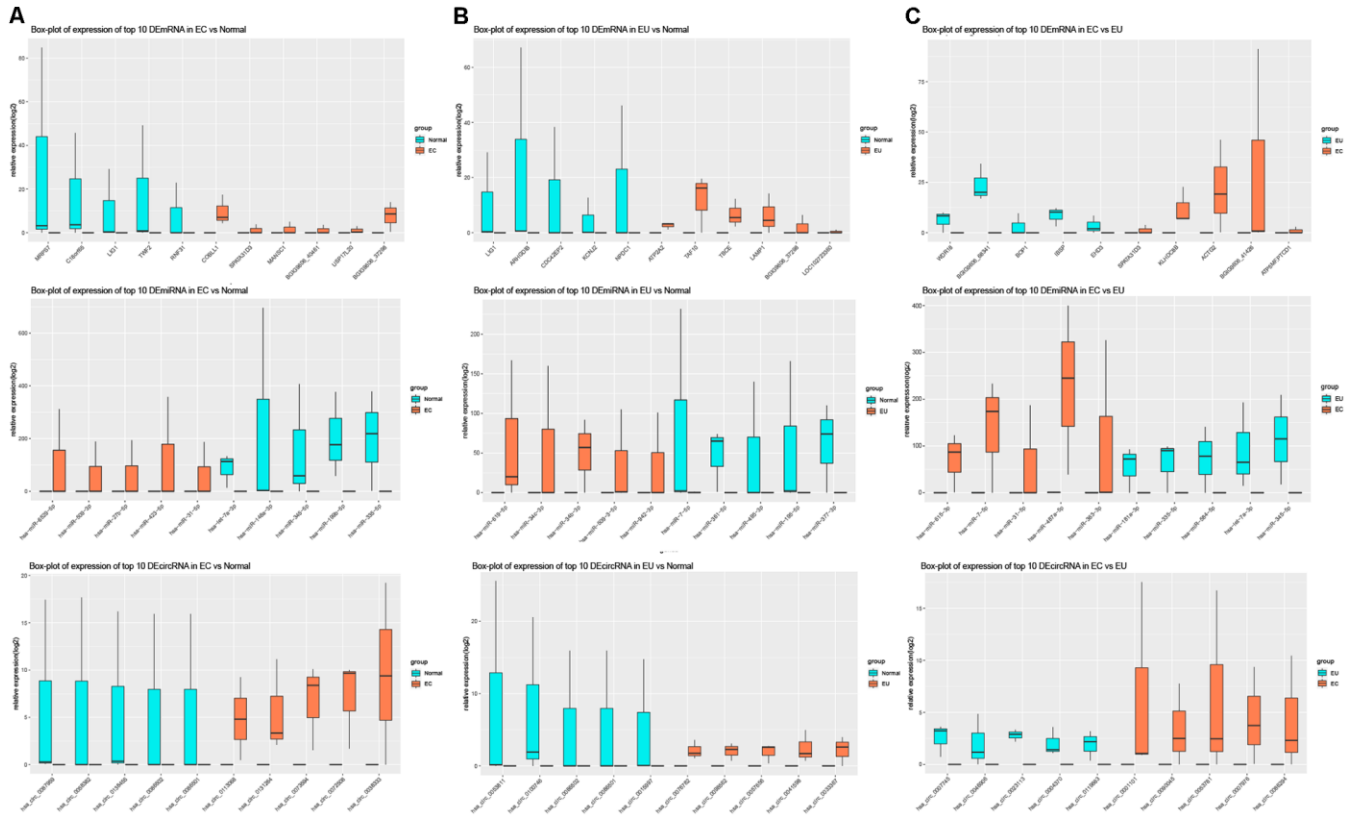

**Supplementary Figure 1.** Histogram showing the expression of the top 10 DECs, DEMs and DEMs between the EC and Ctrl (A), EU and Ctrl (B) and EC and EU groups (C).

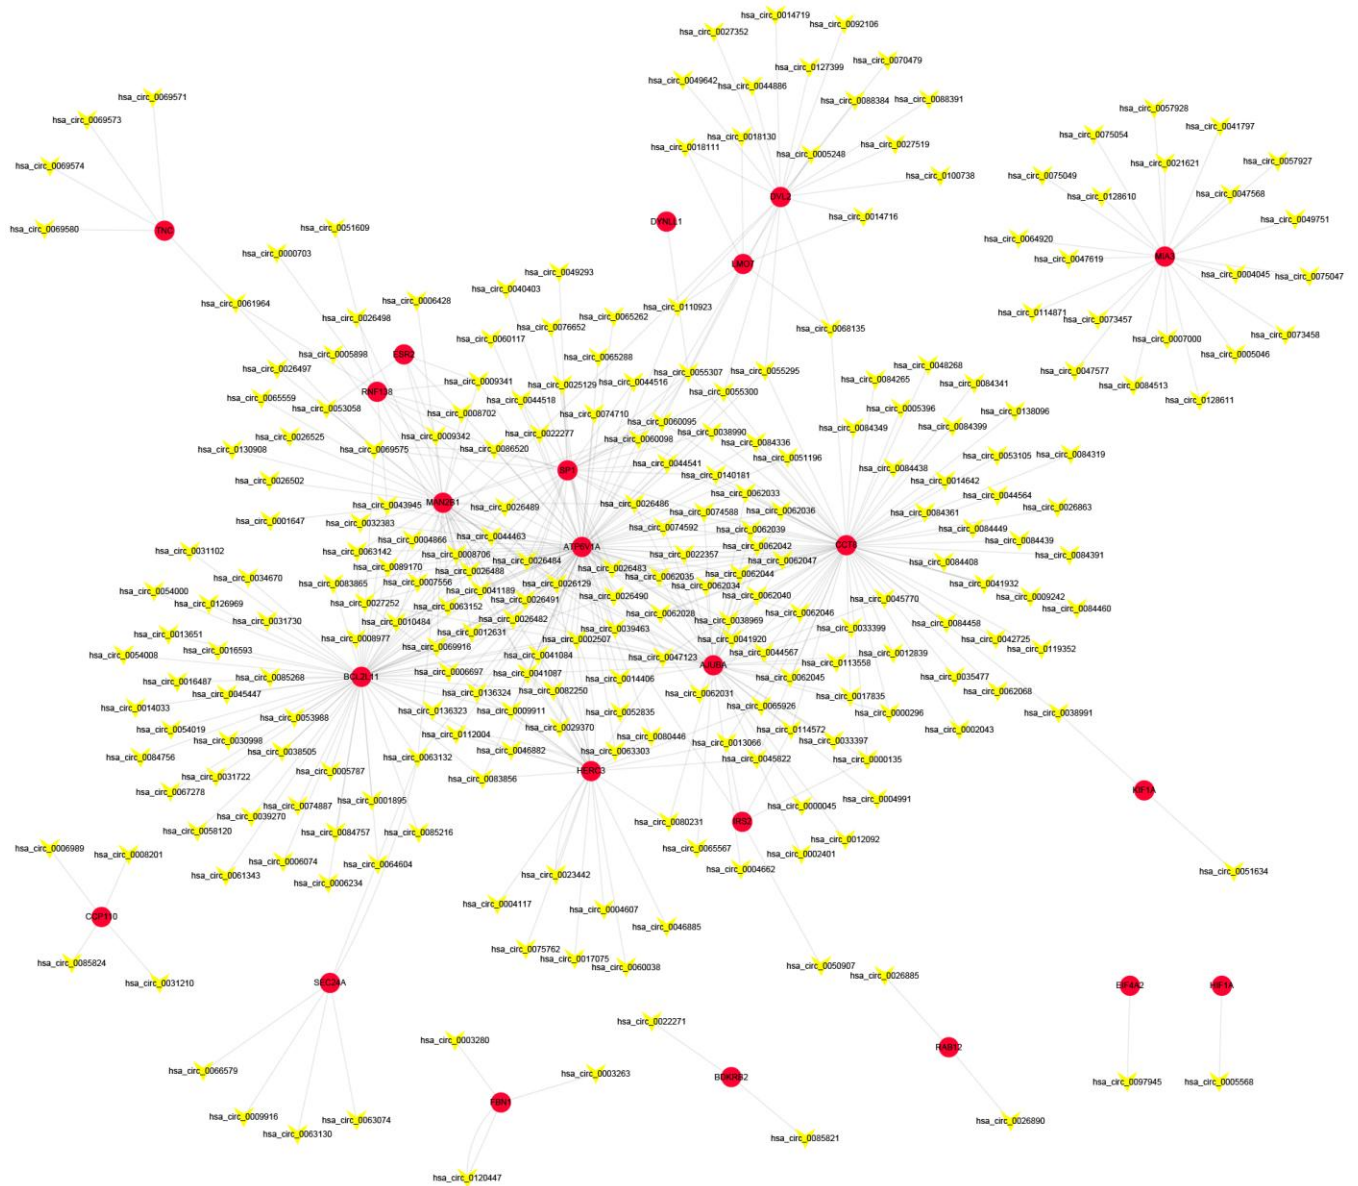

**Supplementary Figure 2. The circRNA-mRNA co-expression network.** Yellow V-shaped nodes represent DECs, and red circular nodes represent DEMs.
